# Supplementary material for: Semiconductor Two-Dimensional PdQ2 (Q=S, Se) Monolayer: Strain Modulating Electronic Band Gaps and SQ Efficiencies
Source: Research Square preprint supplement (doi:10.21203/rs.3.rs-1109301/v1), 2021-12-03
Supplement: Supplementary file 1 [file 6c9c3a2a34f6d499ff549eec.docx]

# SUPPLEMENTARY MATERIAL

**Semiconductor Two-dimensional PdQ2 (Q=S, Se) monolayer: Strain Modulating electronic band gaps and SQ Efficiencies**

Dhara Raval1, Sanjeev K. Gupta2, *, P. N. Gajjar3, ***** and Rajeev Ahuja4

1,3Department of Physics, University School of Sciences, Gujarat University, Ahmedabad 380009, India.

2Computational Materials and Nanoscience Group, Department of Physics and Electronics, St. Xavier's College, Ahmedabad 380009, India.

3Ångströmlaboratoriet, Department of Physics and Astronomy, Uppsala University, Lägerhyddsvägen 1, Box 516, 751 20 Uppsala, Sweden.

*(24, November, 2021)*

**Keyword (s):** 2D monolayer, Density functional theory, Band structure, Carrier mobility, SQ efficiency

*Corresponding authors: Prof. (Dr.) P. N. Gajjar (E-mail: pngajjar@gujaratuniversity.ac.in, pngajjar@rediffmail.com) and Dr. Sanjeev K. Gupta (E-mail: sanjeev.gupta@sxca.edu.in)

**
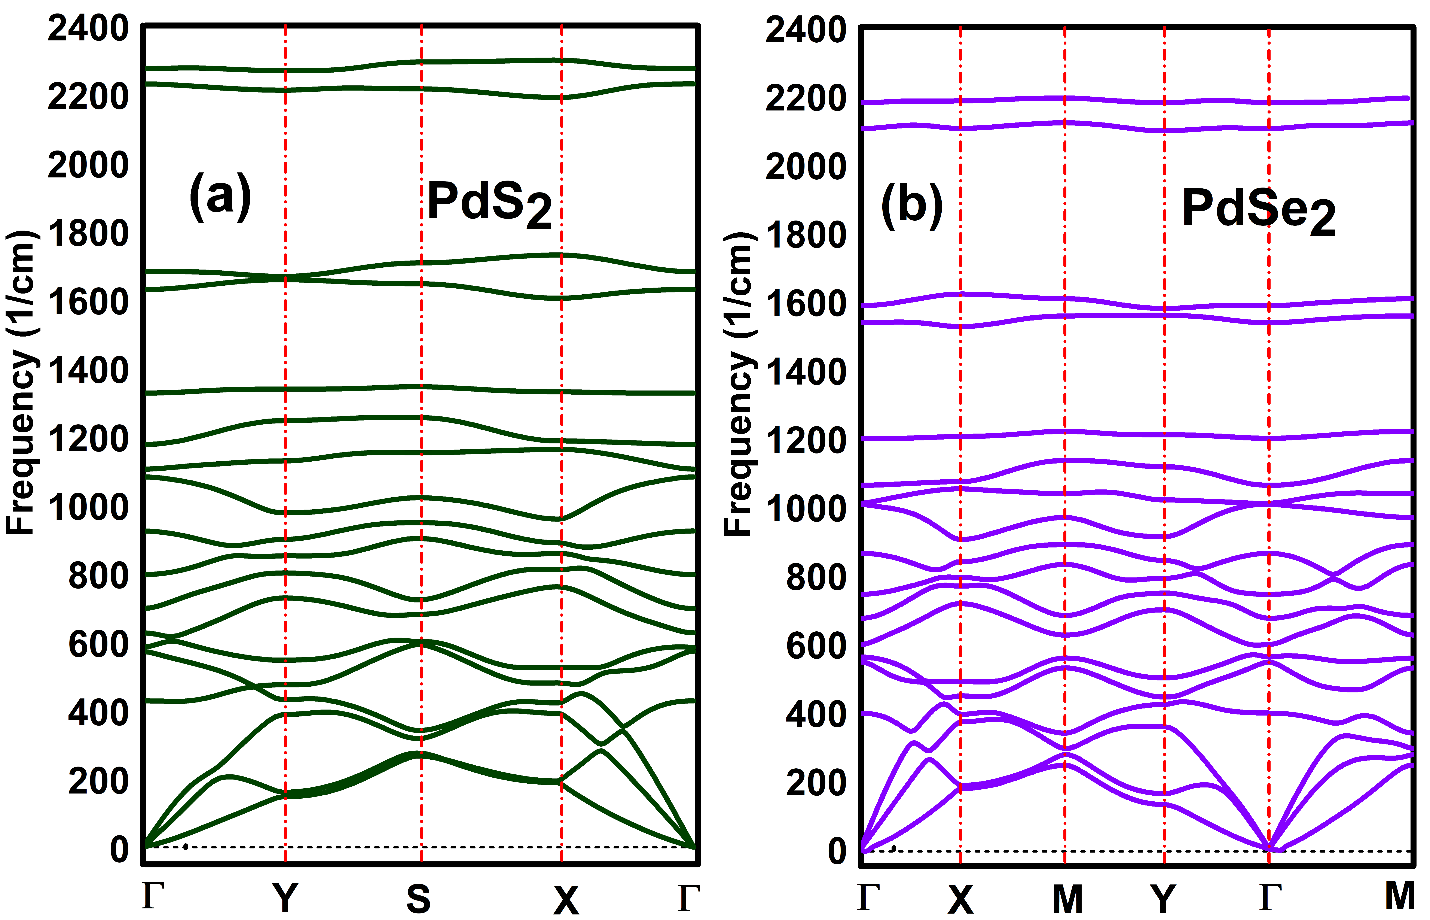
**

**Figure S1.** (colour online) Phonon spectrum of penta-PdQ2 monolayers. (a) For penta-PdS2 and (b) For penta-PdSe2.


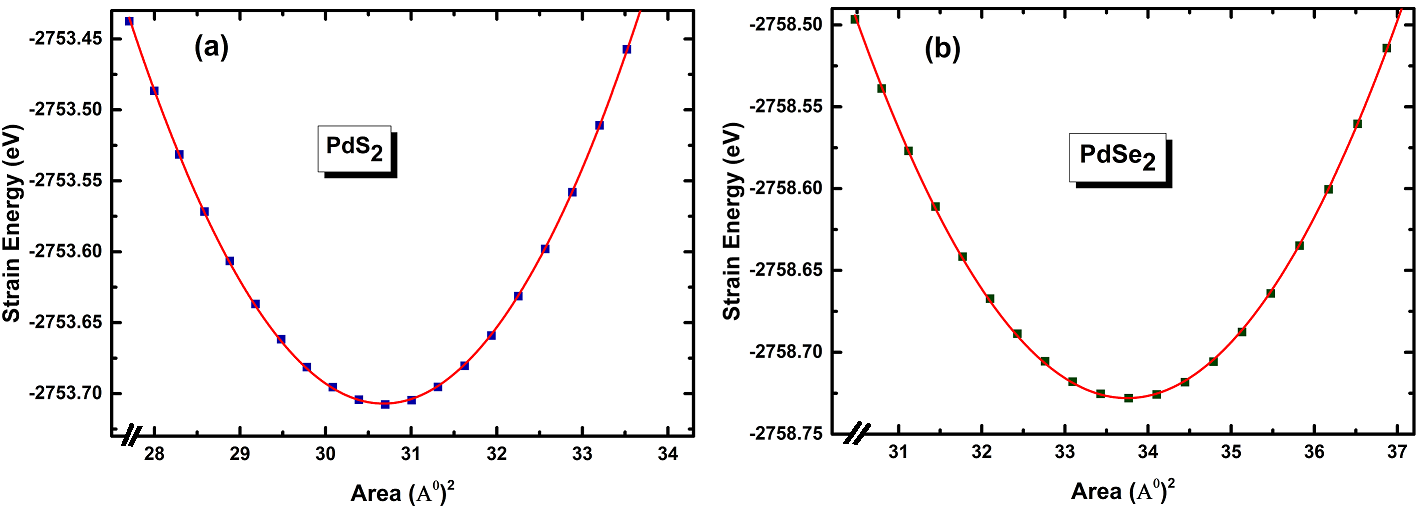


**Figure S2.** (colour online) The Strain energy (eV) vs area (Å2) curve under unstrained and loaded structures. (a) For penta-PdS2 and (b) For penta-PdSe2


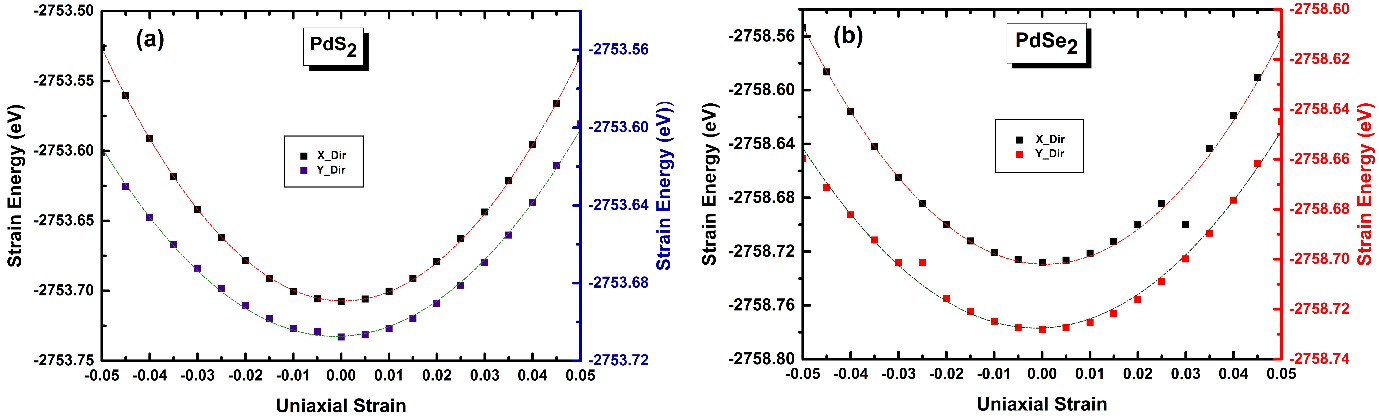


**Figure S3.** (colour online) The strain energy (eV) vs uniaxial strain (x or y) curve under pristine and loaded structures. (a) For penta-PdS2 and (b) For penta-PdSe2


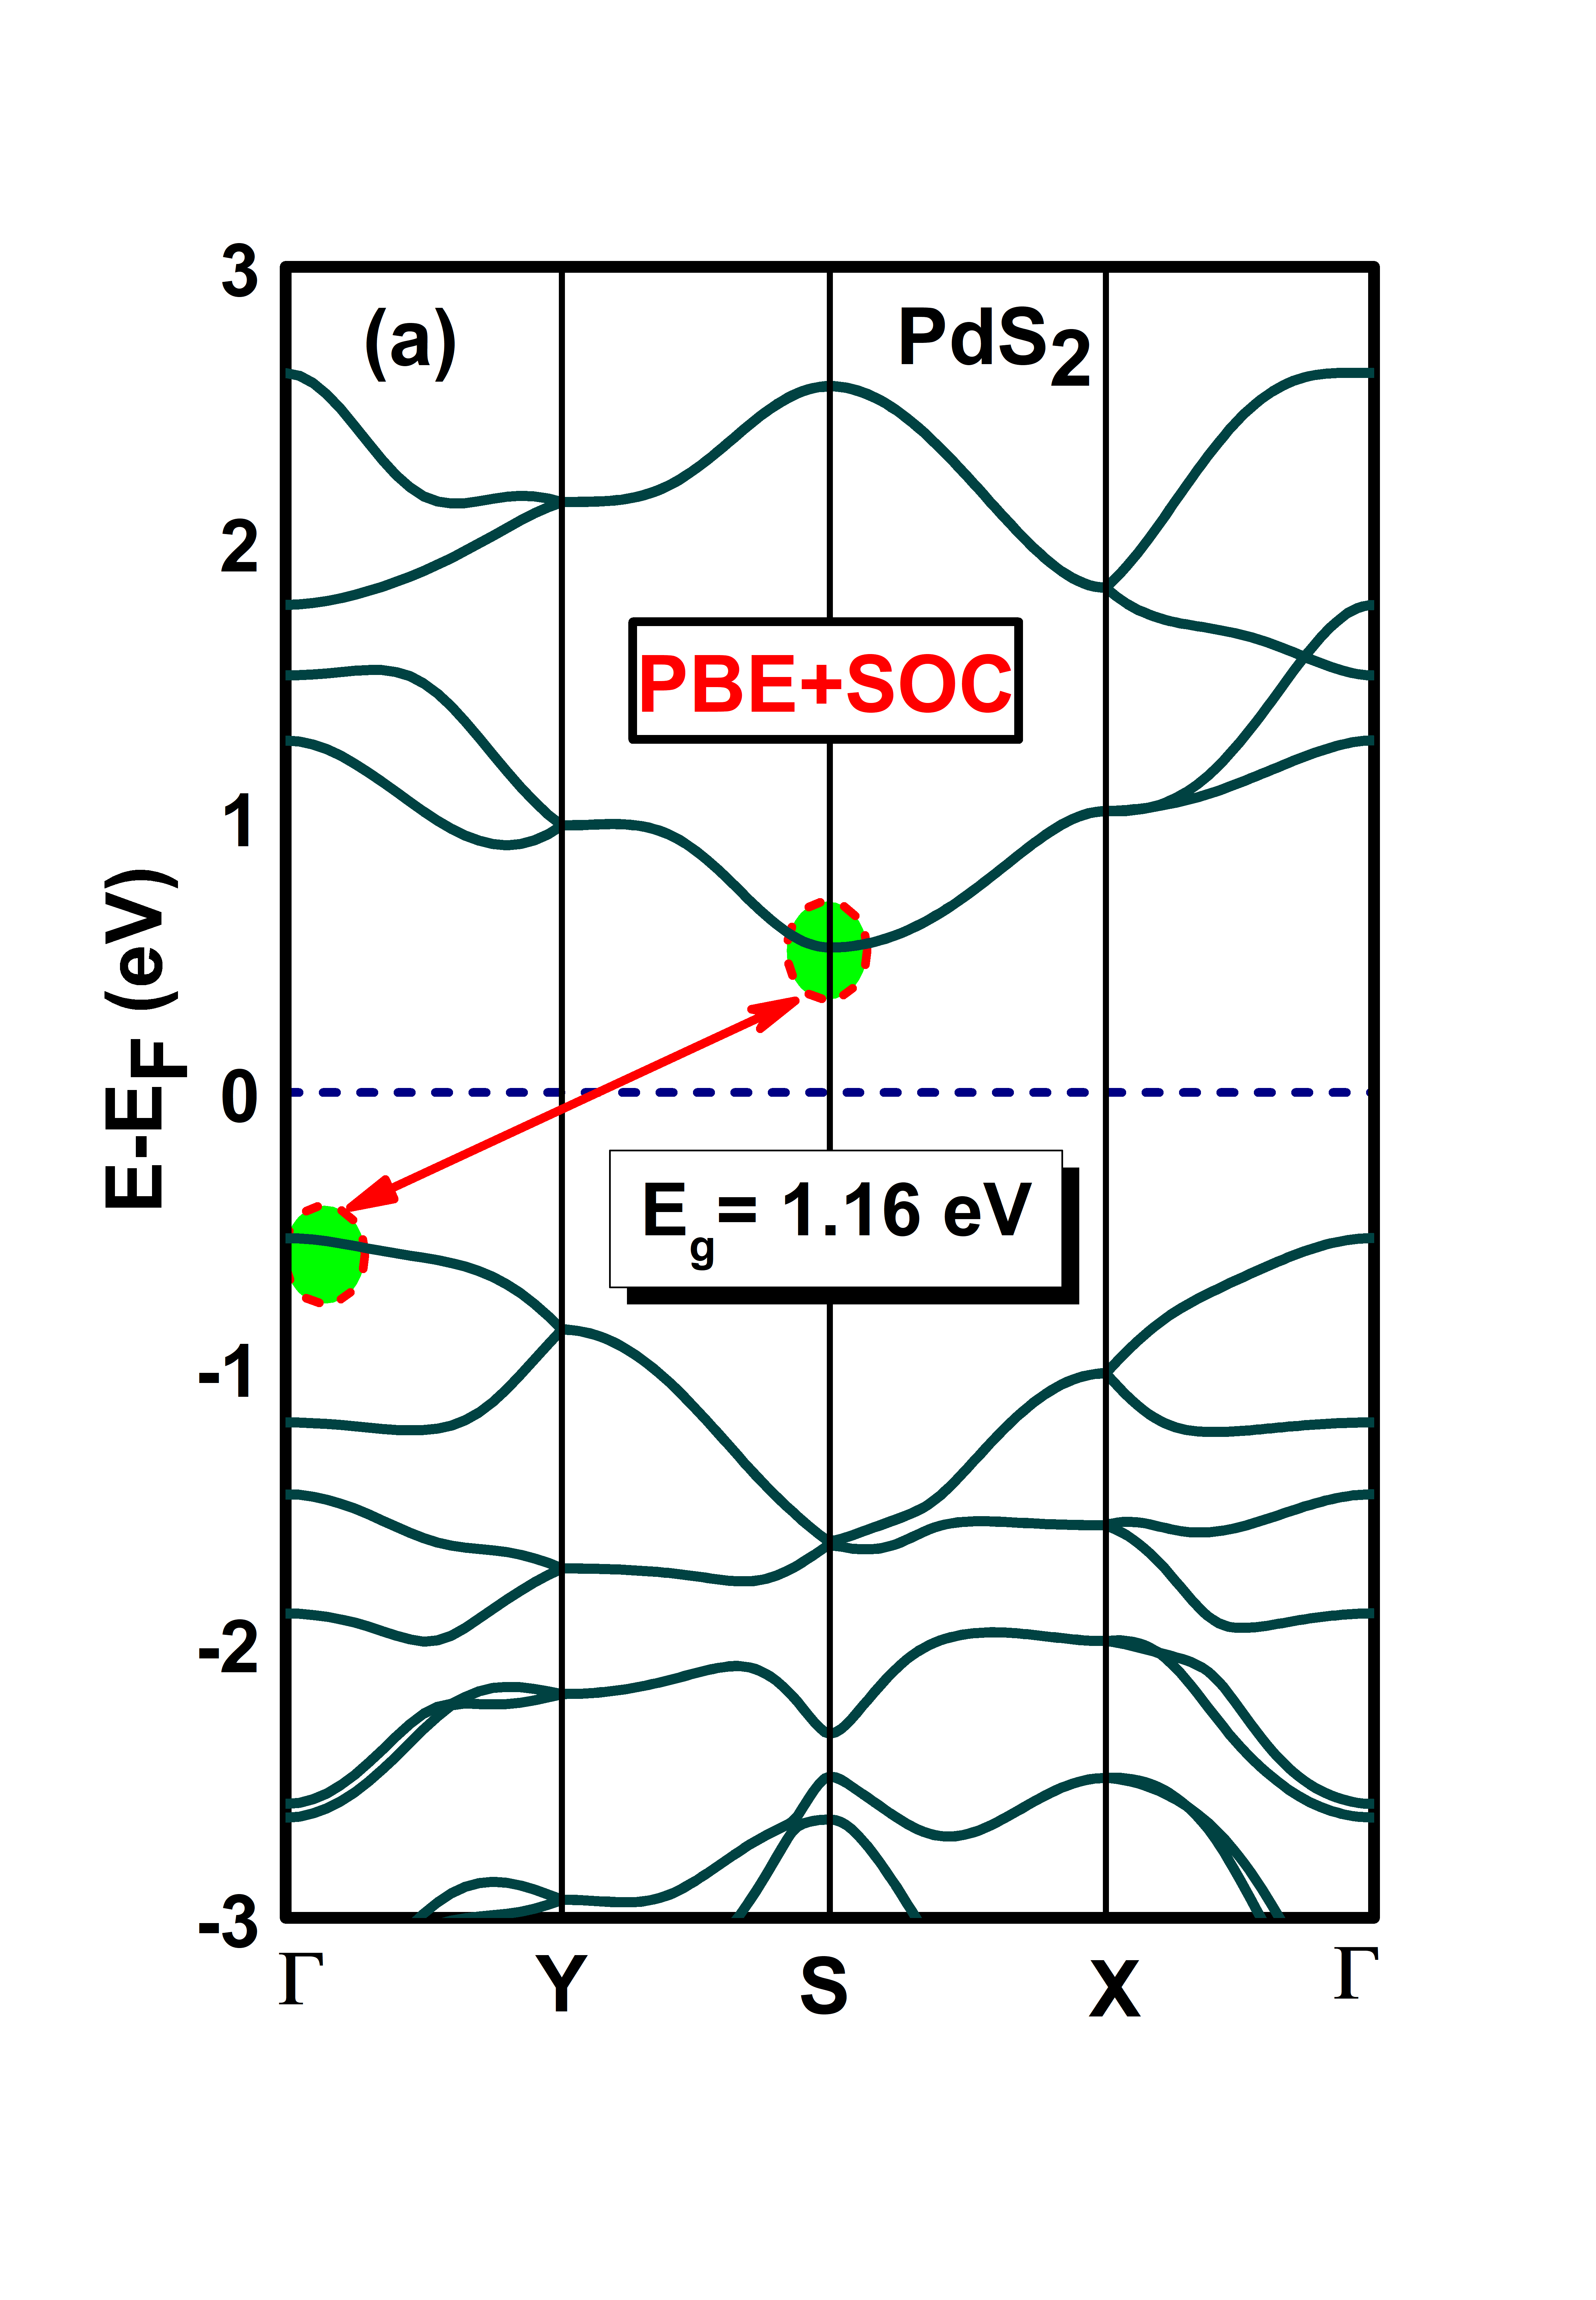

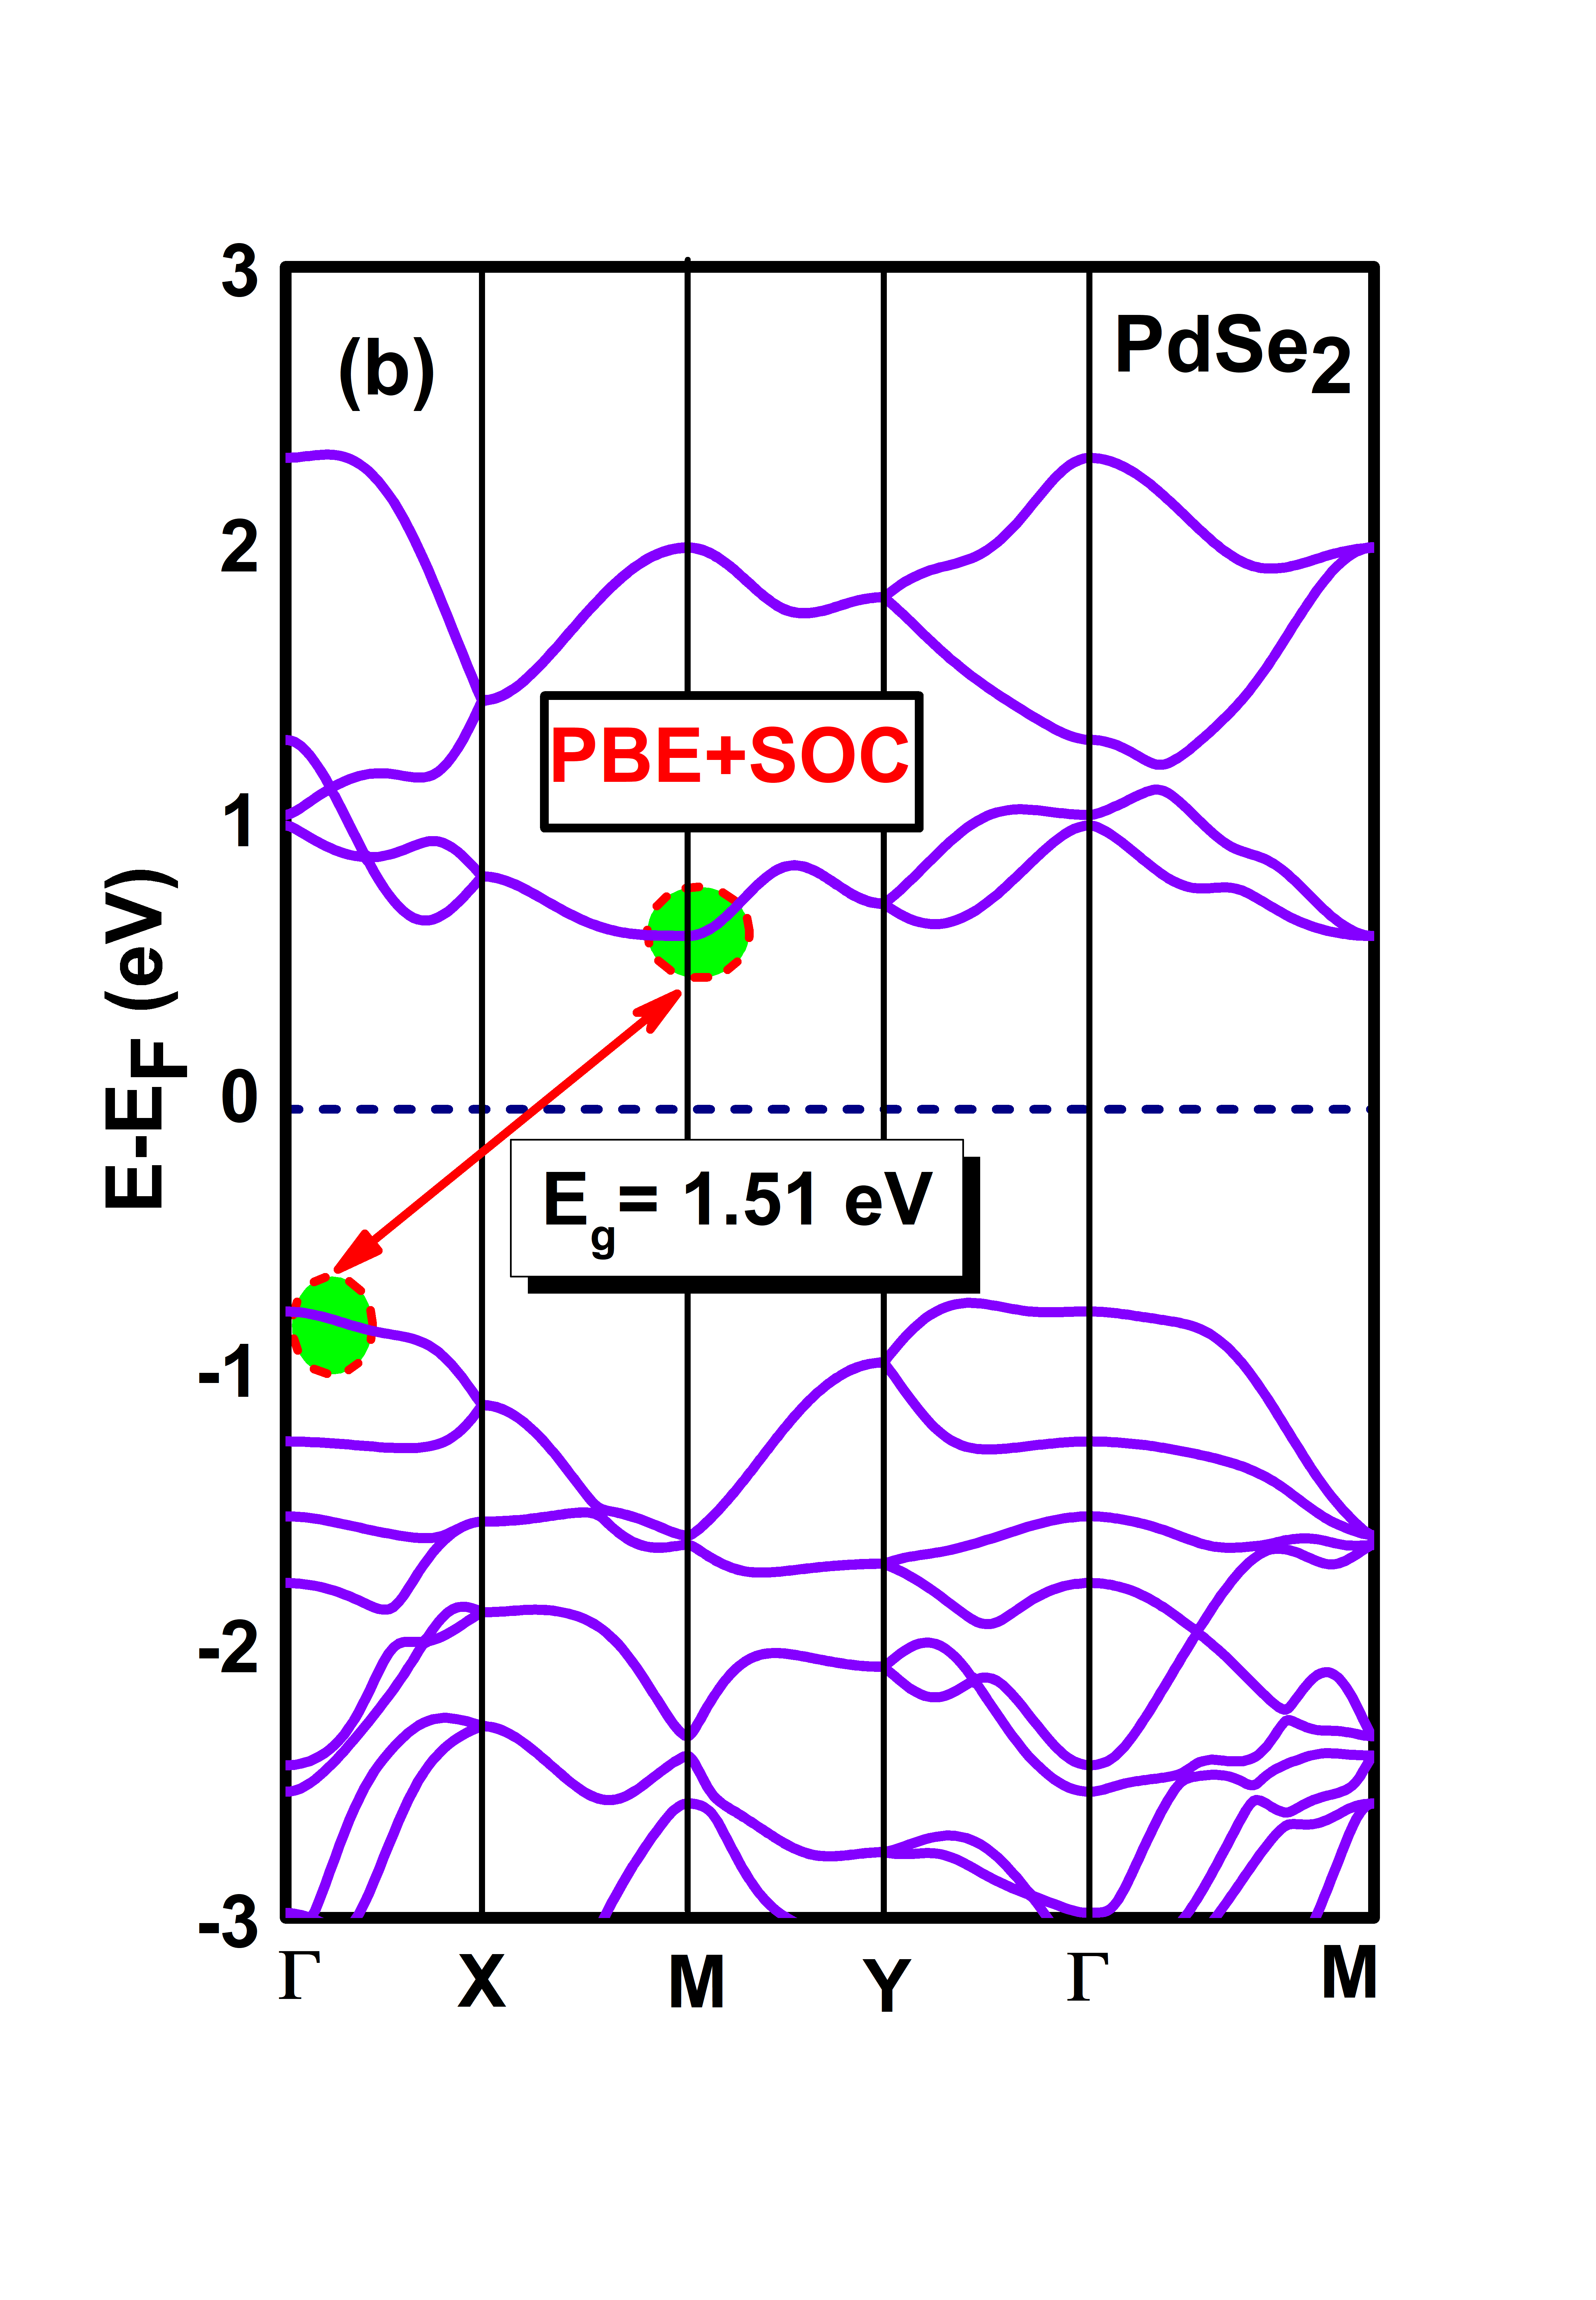


**Figure S4.** (Colour online) Electronic band structure of 2D-penta-PdQ2 with PBE+SOC. (a) For penta-PdS2 monolayer and (b) For penta-PdSe2 monolayer.


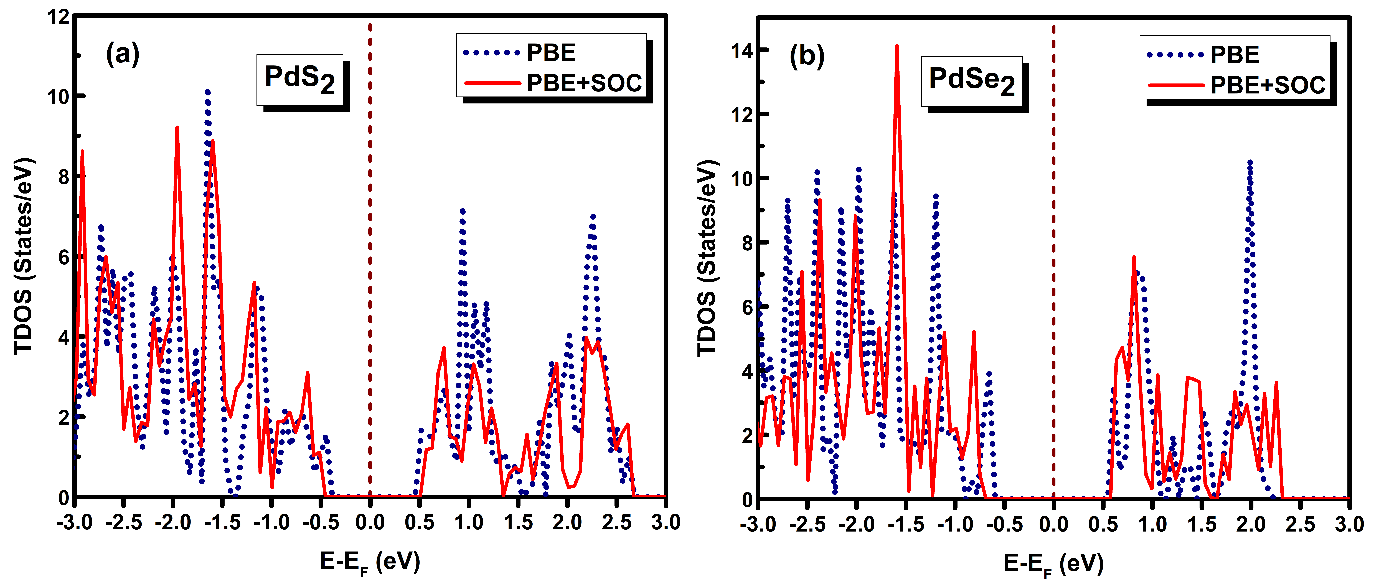


**Figure S5.** (Colour online) Total density of states (TDOS) States/eV with PBE and PBE+SOC calculations. (a) For penta-PdS2 monolayer and (b) For penta-PdSe2 monolayer.

| 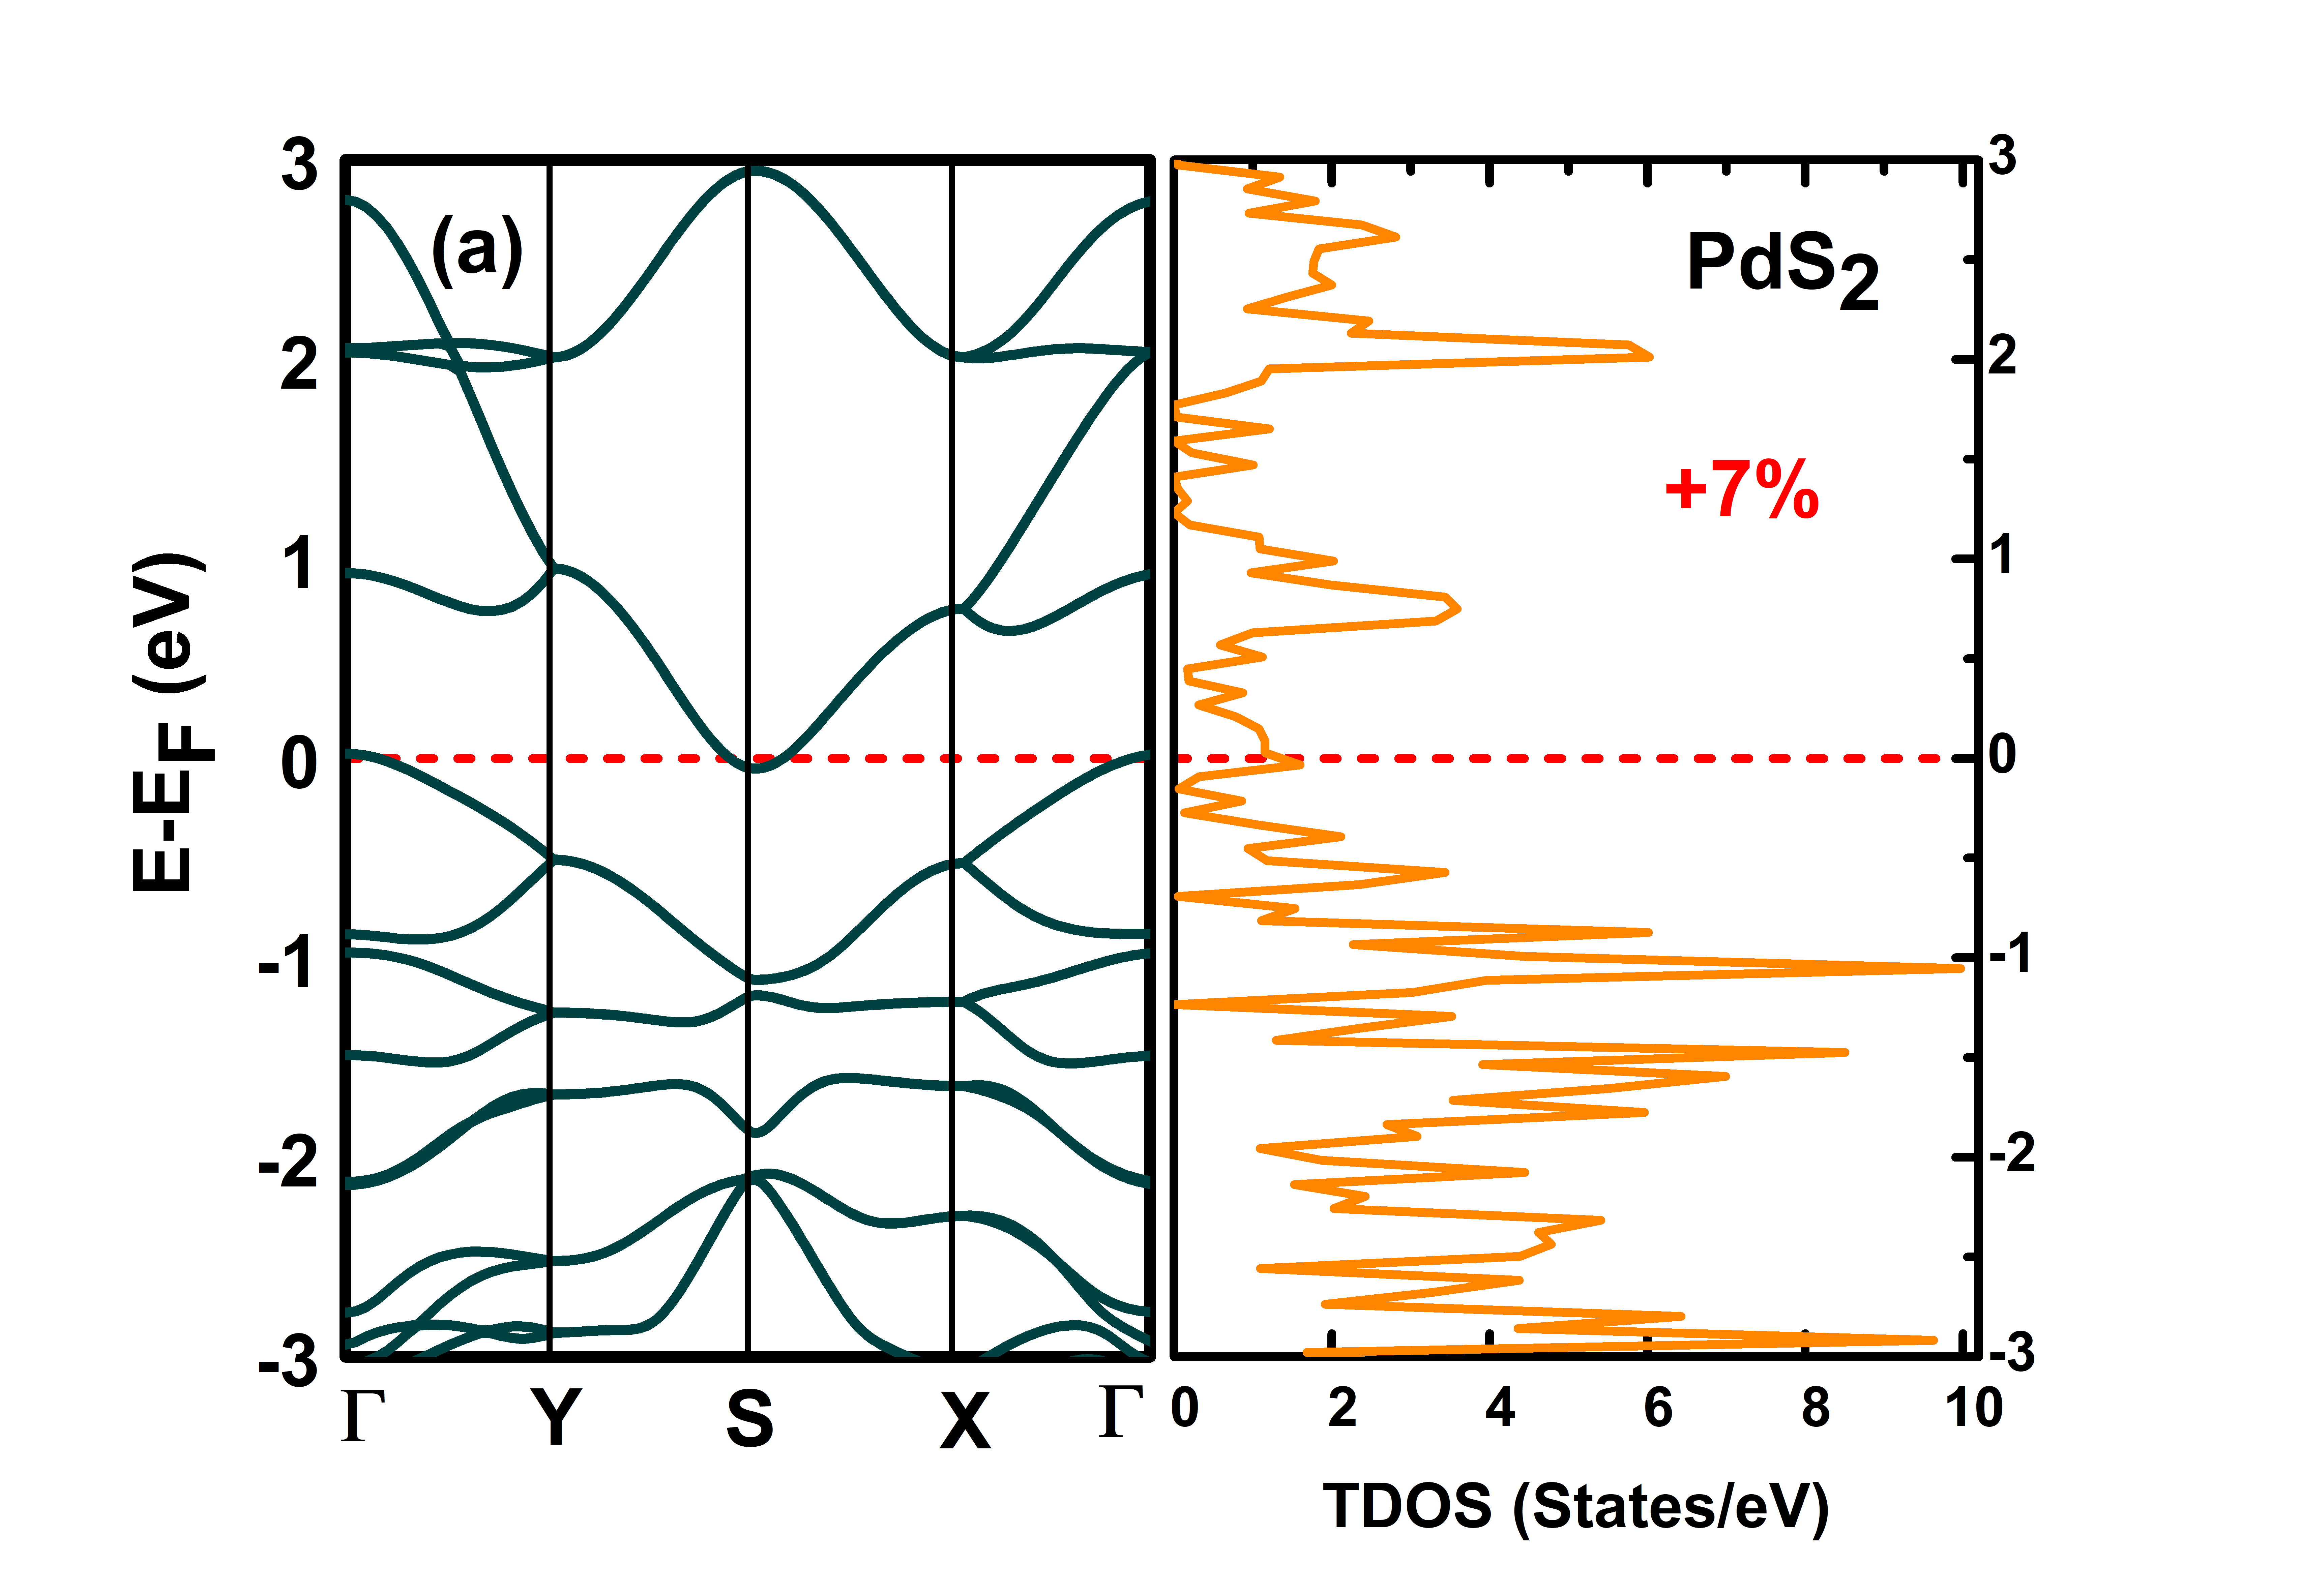 | 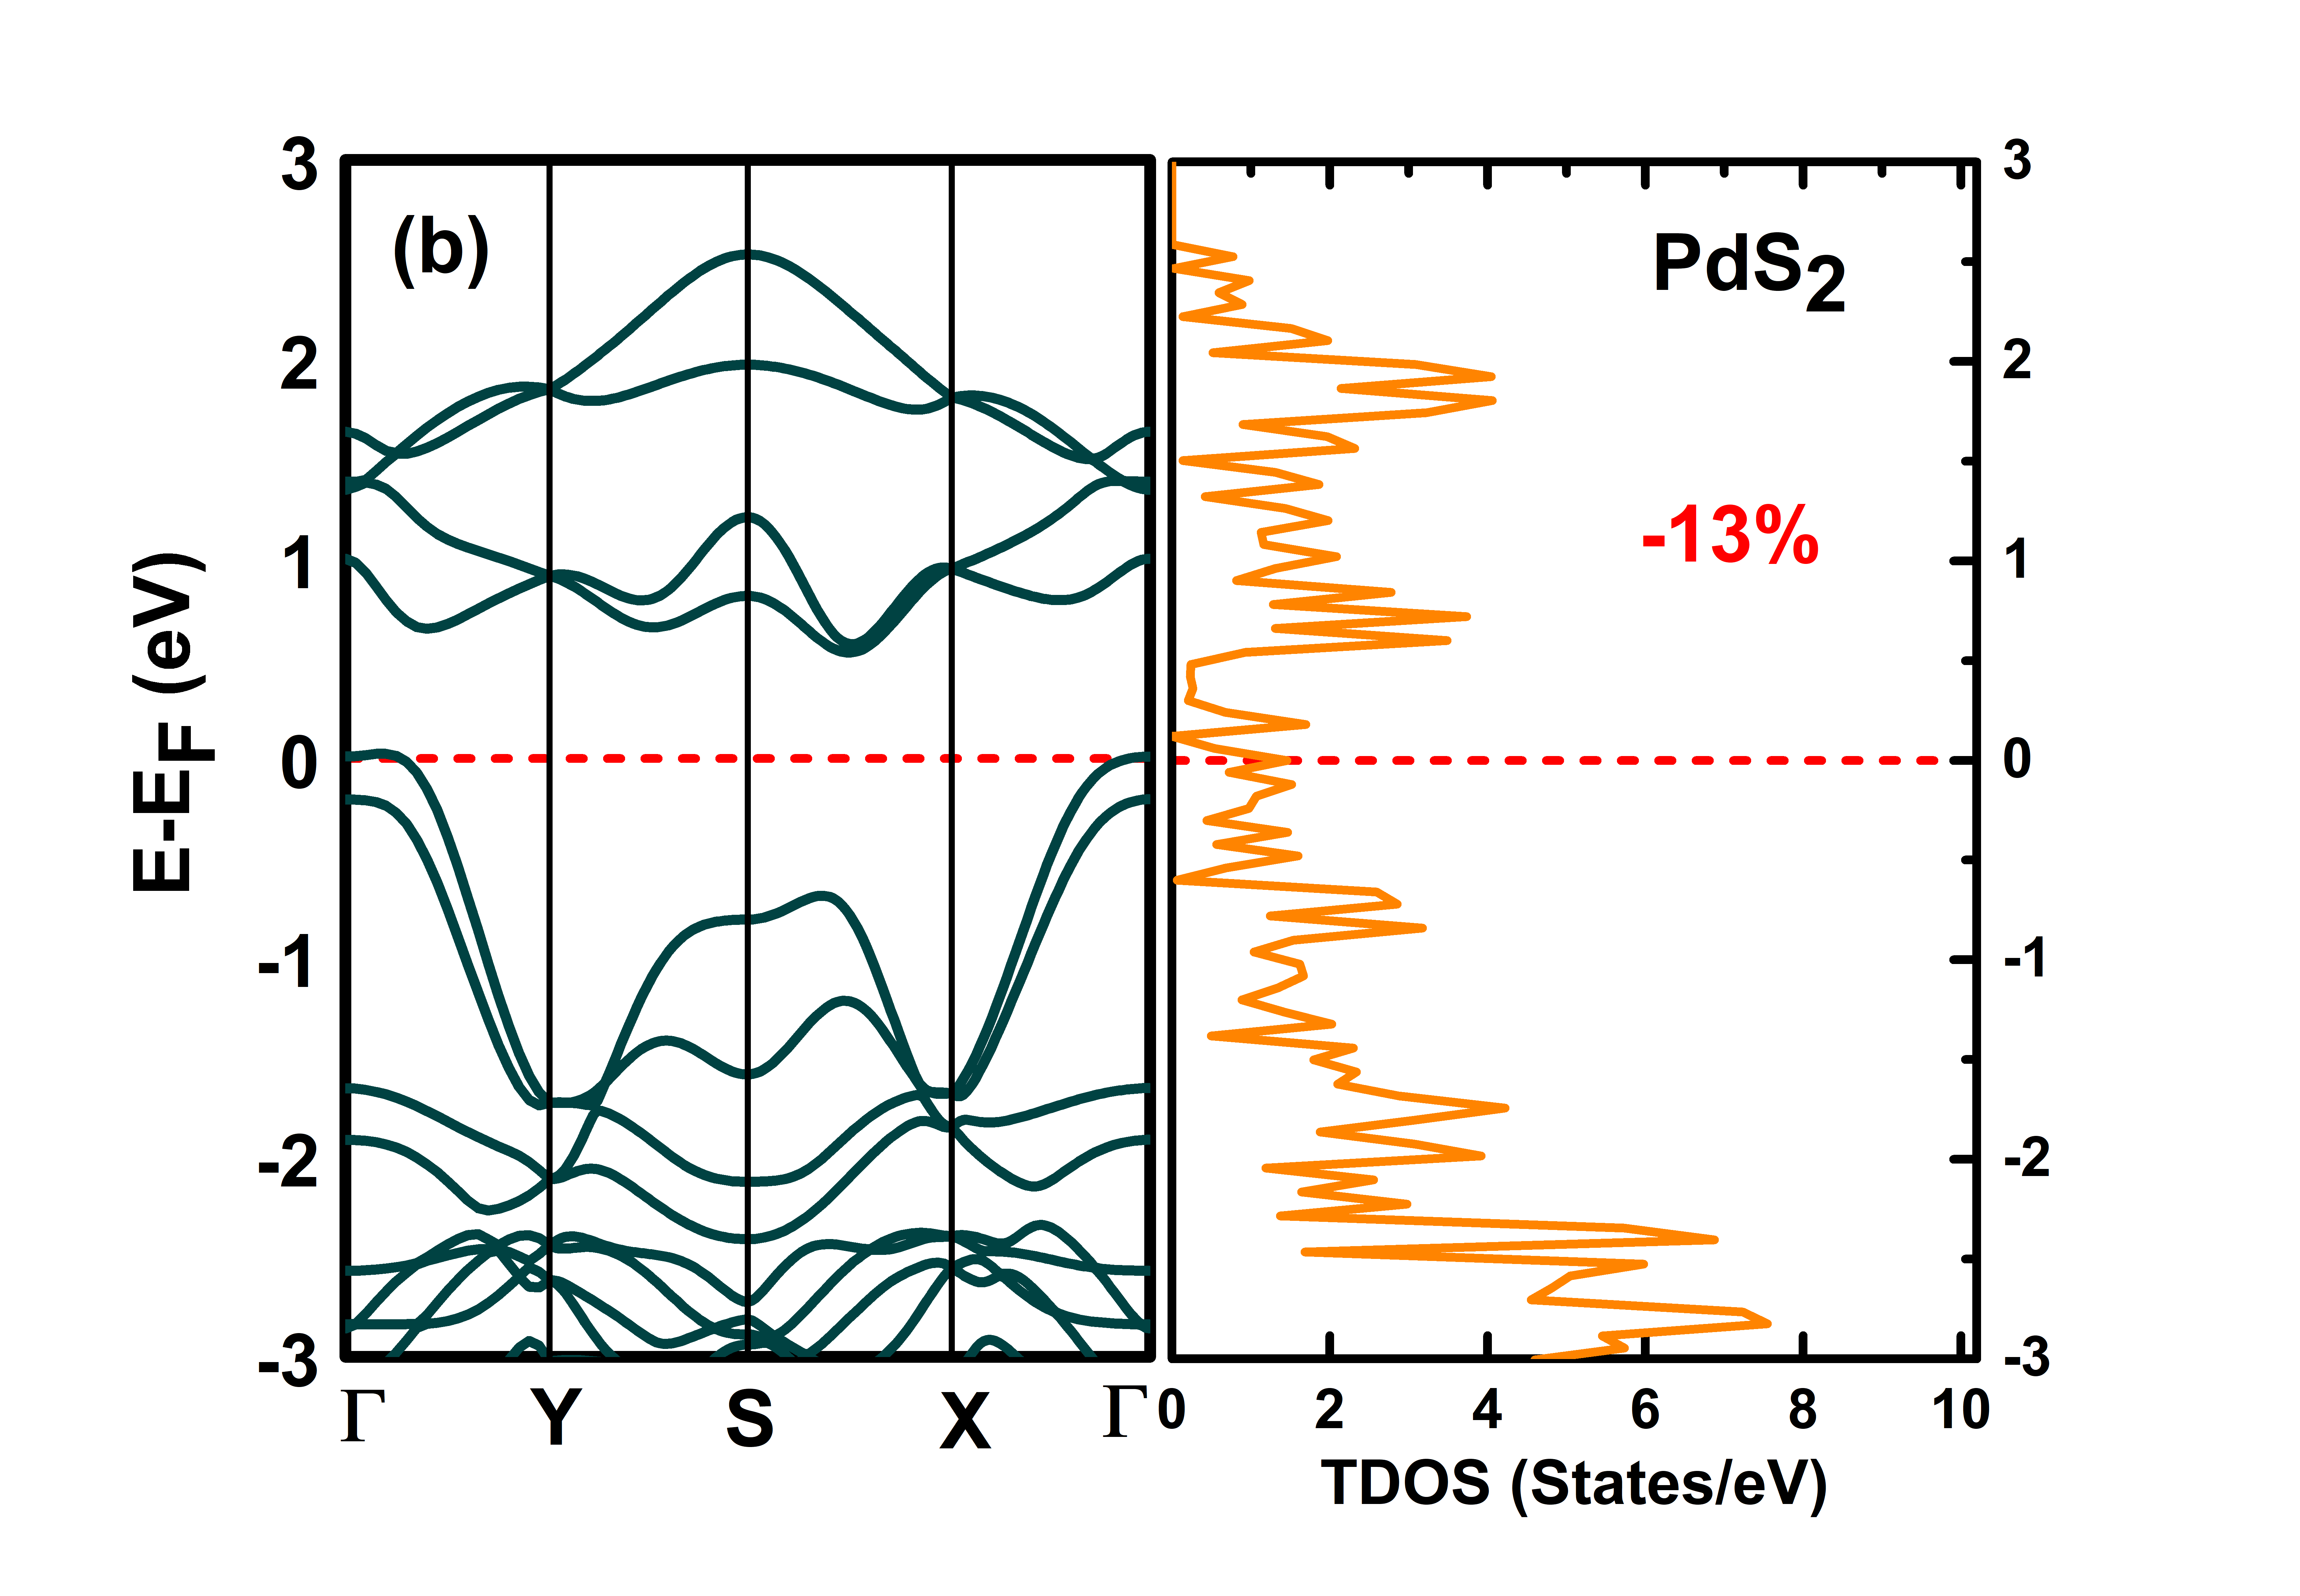 |
| --- | --- |

**Figure S6.** (Colour online) Electronic band structure and total density of states (TDOS) States/eV. (a) For penta-PdS2 monolayer under critical tensile strain (+7%) and (b) For penta-PdS2 monolayer under compressive strain (-13%).

| 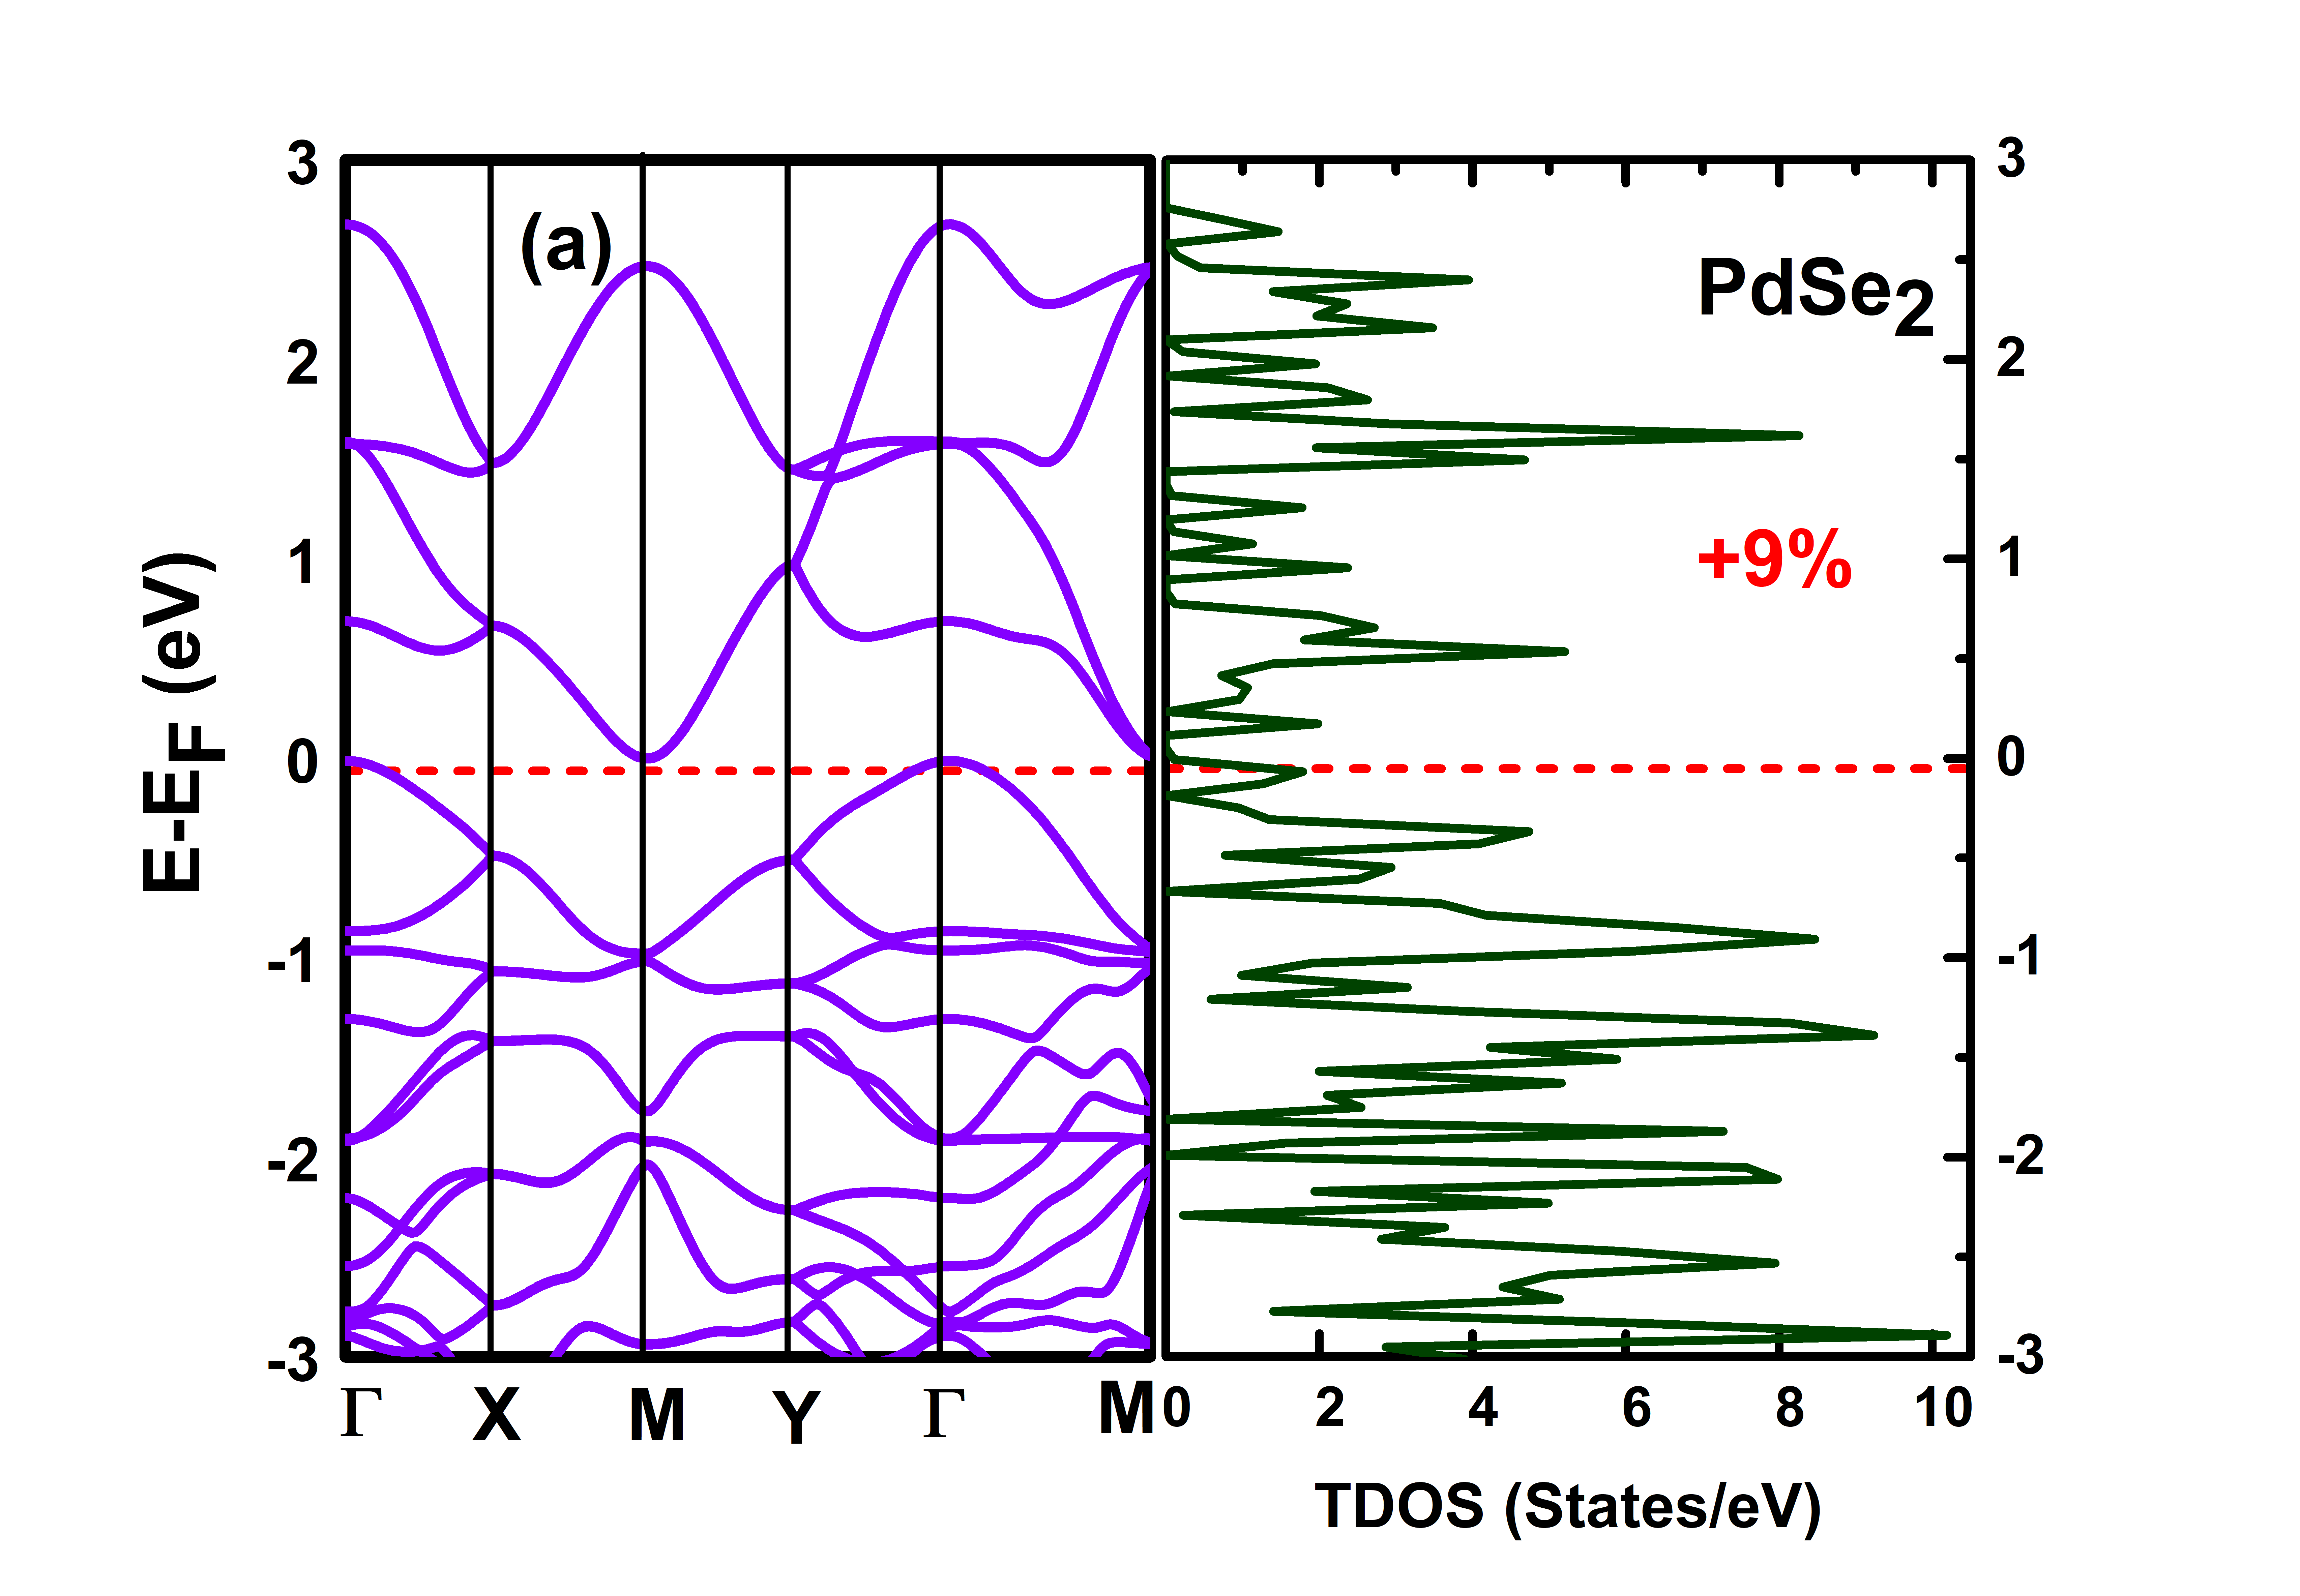 | 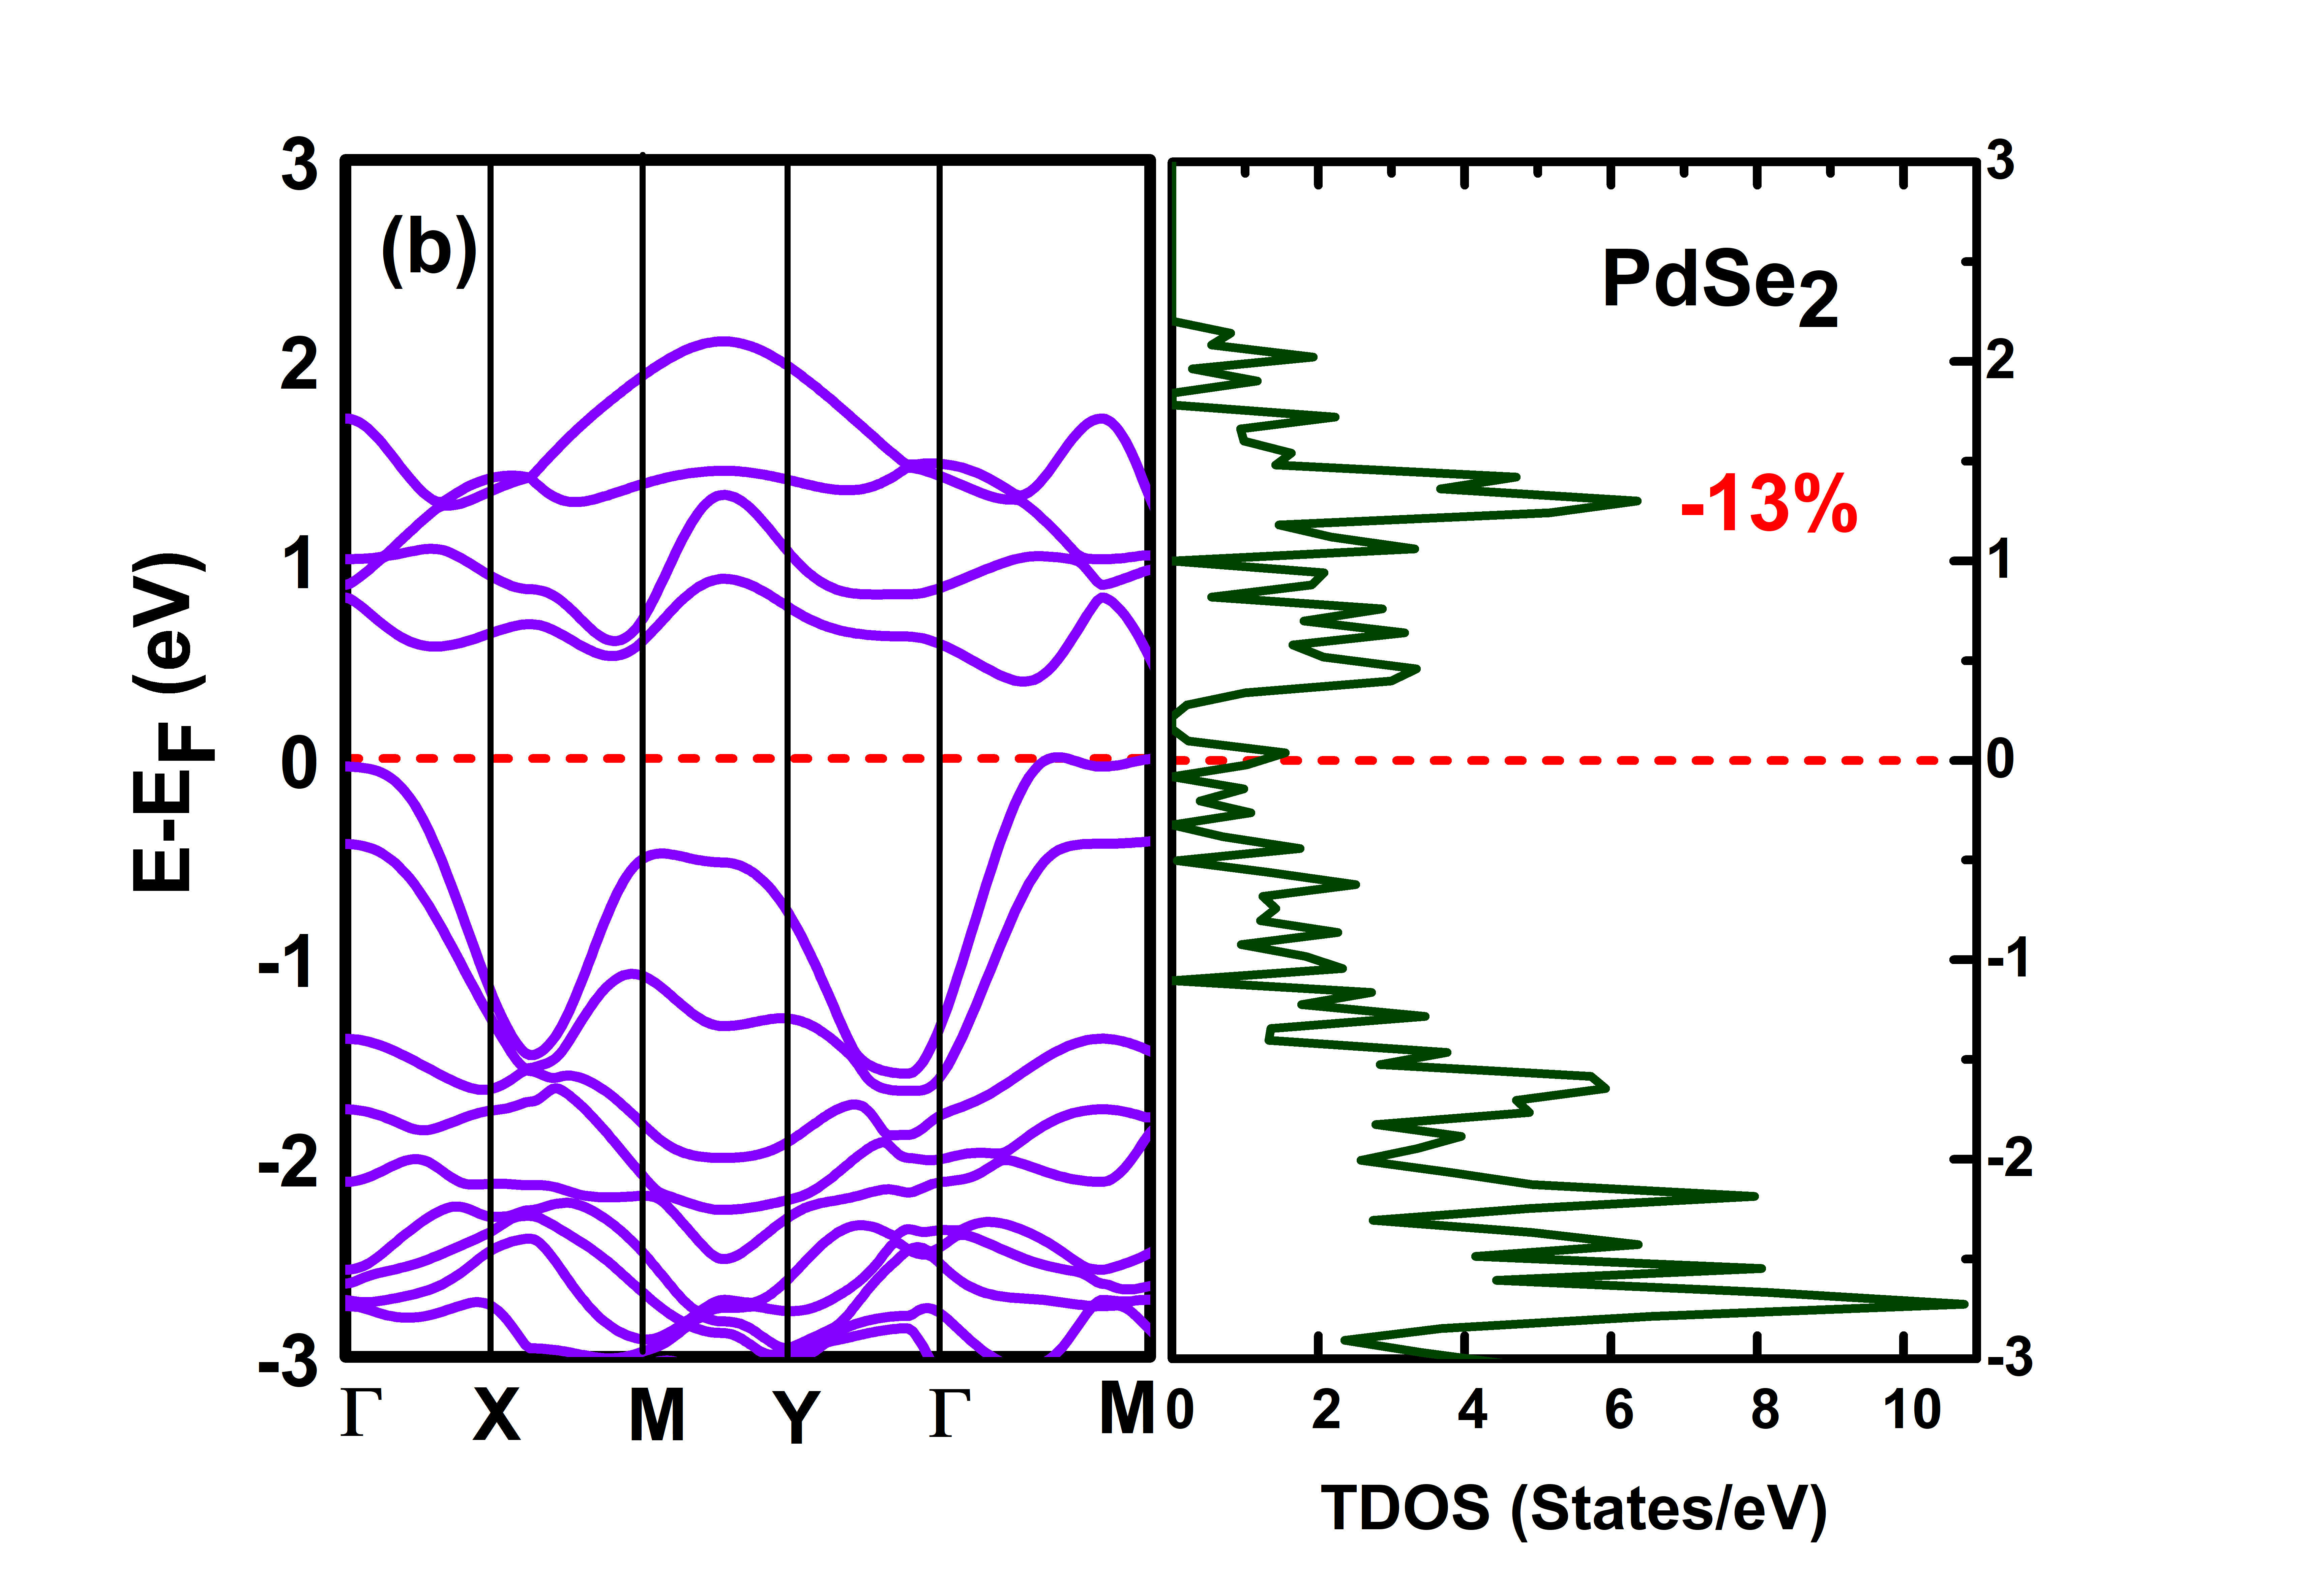 |
| --- | --- |

**Figure S7.** (Colour online) Electronic band structure and total density of states (TDOS) States/eV. (a) For penta-PdSe2 monolayer under critical tensile strain (+9%) and (b) For penta-PdSe2 monolayer under critical compressive strain (-13%).


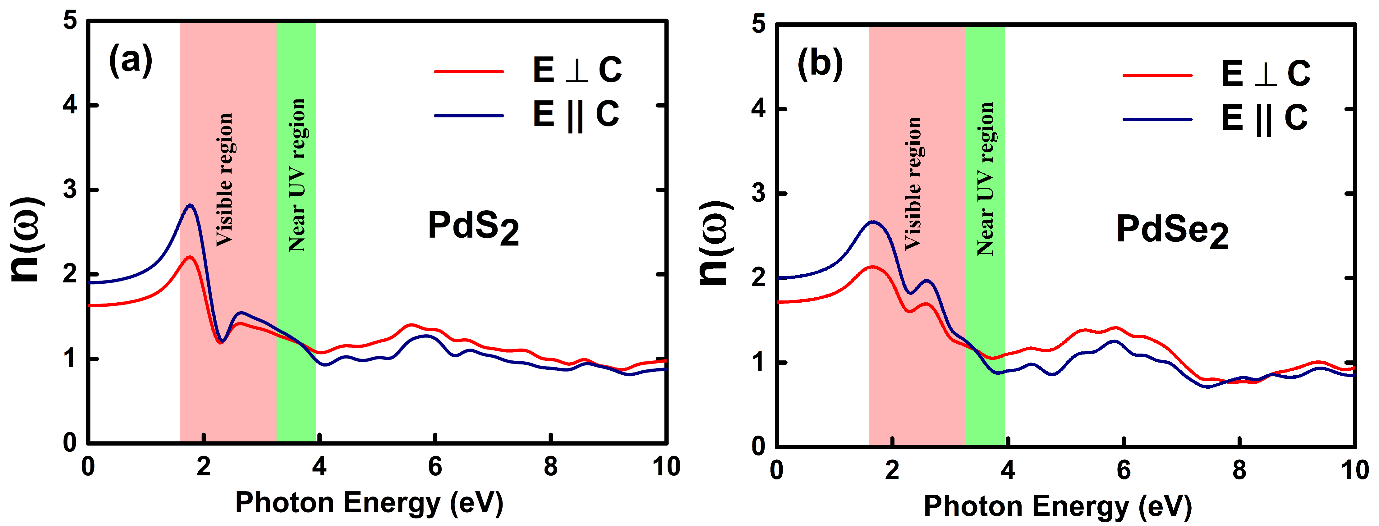


**Figure S8.** (Colour online) Refractive index of penta-PdQ2 monolayers for parallel and perpendicular polarization. (a) For penta-PdS2 monolayer and (b) For penta-PdSe2 monolayer.


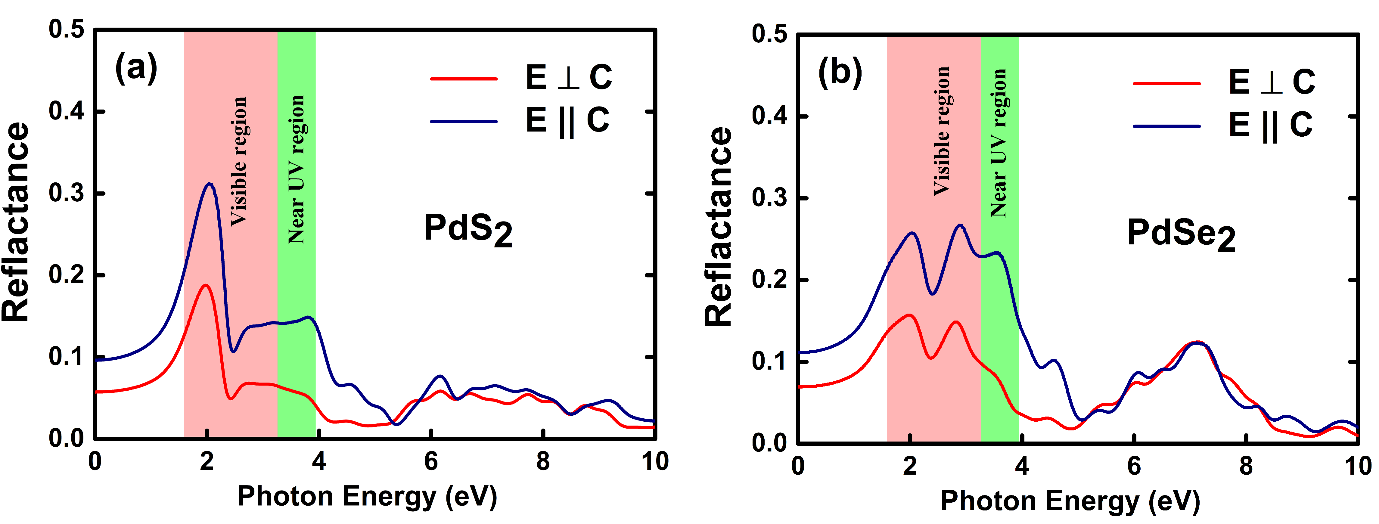


**Figure S9.** (Colour online) Reflectance of penta-PdQ2 monolayer for parallel and perpendicular polarization. (a) For penta-PdS2 monolayer and (b) For penta-PdSe2 monolayer.

| **Penta-PdS2 Monolayer** | | | | **Penta-PdSe2 Monolayer** | | | |
| --- | --- | --- | --- | --- | --- | --- | --- |
| Compressive strain %  (-Ve) | | Tensile strain % (+Ve) | | Compressive strain % (-Ve) | | Tensile strain % (+Ve) | |
| -13 % | -345.00 cm-1 | -- | -- | -13 % | -1110 cm-1 | -- | -- |
| -12 % | -123.81 cm-1 | -- | -- | -12 % | -1635 cm-1 | -- | -- |
| -11 % | -62.14 cm-1 | -- | -- | -11 % | -76.71 cm-1 | -- | -- |
| -10 % | -56.78 cm-1 | -- | -- | -10 % | -89.43 cm-1 | -- | -- |
| -9 % | -7.35 cm-1 | -- | -- | -9 % | -78.63 cm-1 | +9 % | -23.11 cm-1 |
| -8 % | -2.30 cm-1 | -- | -- | -8 % | -63.03 cm-1 | +8 % | -6.0 cm-1 |
| -7.0 % | -57.47 cm-1 | +7.0 % | Positive Frequency | -7.0 % | Positive Freq. | +7 % | Positive  Frequency |
| -6.0 % | -8.05 cm-1 | +6.0 % | Positive Frequency | -6.0 % | -65.78 cm-1 | +6 % | -12.2 cm-1 |
| -5.0 % | Positive  Freq. | +5.0 % | Positive Frequency | -5.0 % | -65.13 cm-1 | +5.0 % | -40.49 cm-1 |
| -4.0 % | -23.15 cm-1 | +4.0 % | Positive Frequency | -4.0 % | -37.65 cm-1 | +4.0 % | Positive Frequency |
| -3.0 % | -48.68 cm-1 | +3.0 % | Positive  Frequency | -3.0 % | -32.52 cm-1 | +3.0 % | Positive  Frequency |
| -2.0 % | Positive Freq. | +2.0 % | Positive  Frequency | -2.0 % | -35.62 cm-1 | +2.0 % | -7.50 cm-1 |
| -1.0 % | Positive Freq. | +1.0 % | -61.84 cm-1 | -1.0 % | -50.80 cm-1 | +1.0 % | Positive  Frequency |

**Table S1**. Phonon frequencies (cm-1) at Γ-point for different Compressive (-Ve) and tensile (+Ve) strain % on 2D penta-PdQ2 monolayers.
